# Supplementary material for: Oxadiazole derivatives as bipolar host materials for high-performance blue and green phosphorescent organic light-emitting diodes
Source: Royal Society of Chemistry journal article supplement (doi:10.1039/c9ra07129f), 2019-01-01
Supplement: c9ra07129f1.pdf [file c9ra07129f1.pdf]

## **Supporting Information**

**for**

# **Oxadiazole Derivatives as Bipolar Host Materials for High-performance Blue and Green Phosphorescent Organic Light-emitting Diodes**

Yanming Wang<sup>a, b \*</sup>, Keke Duan<sup>a</sup>, Guoxiang Li<sup>a</sup>, Gewen Yu<sup>a</sup>

<sup>a</sup> School of Chemistry and Chemical Engineering, Inner Mongolia University of Science and Technology, 7 Aldine Street, Baotou 014010, Inner Mongolia, PR China

<sup>b</sup> School of Chemistry, Dalian University of Technology, 2 Linggong Road, Dalian 116024, PR China E-mail: [wymygw@163.com](mailto:wymygw@163.com)

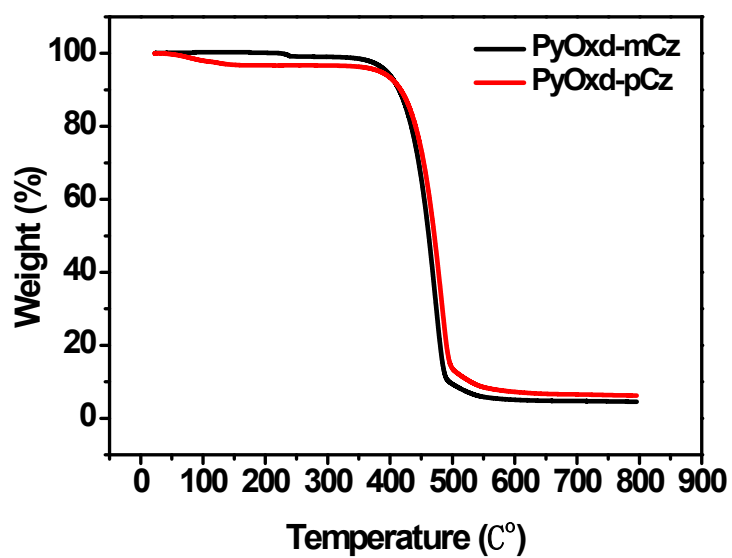

Fig. S1 TGA thermograms of PyOxd-mCz and PyOxd-pCz, recorded at a heating rate of 10 °C min<sup>-1</sup>

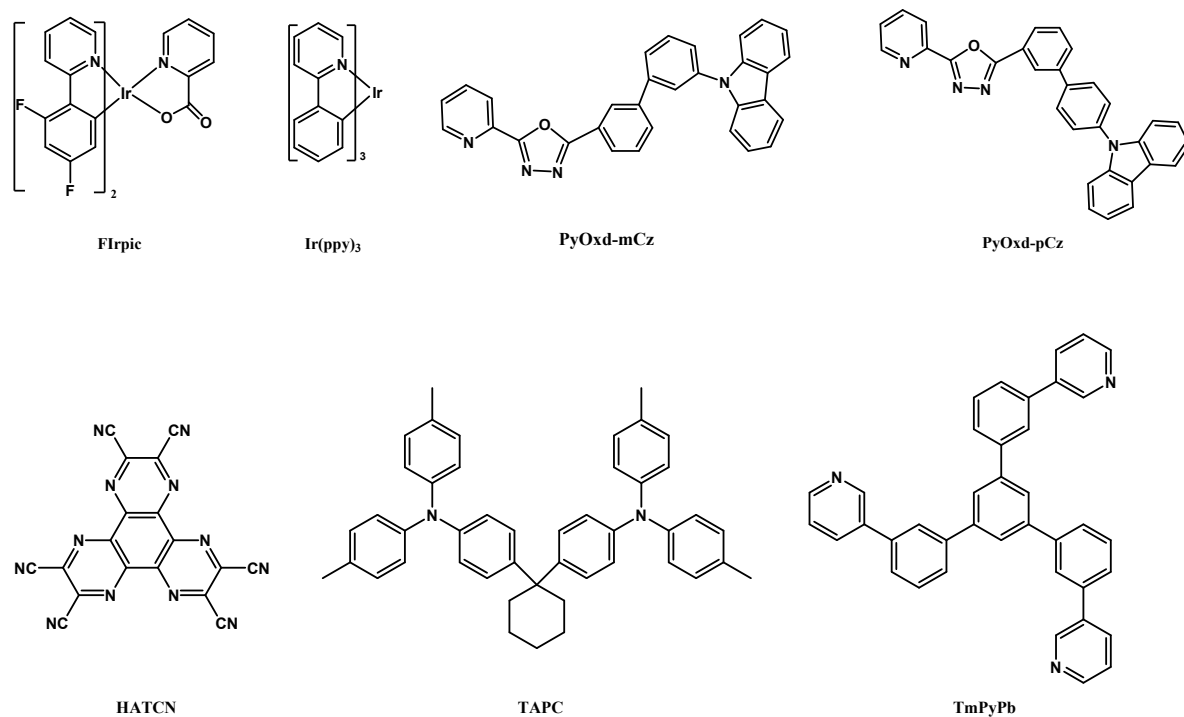

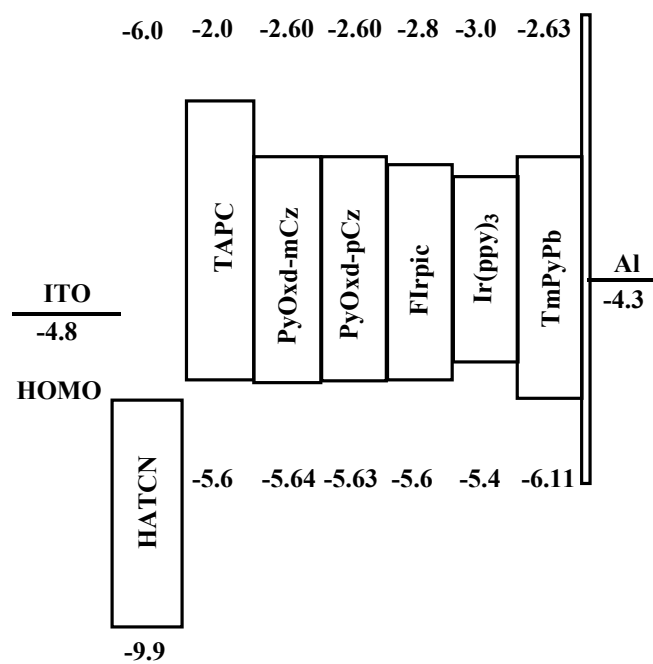

Fig. S2 Chemical structures of related materials and energy level diagram for the single carrier devices and blue and green PHOLEDs.

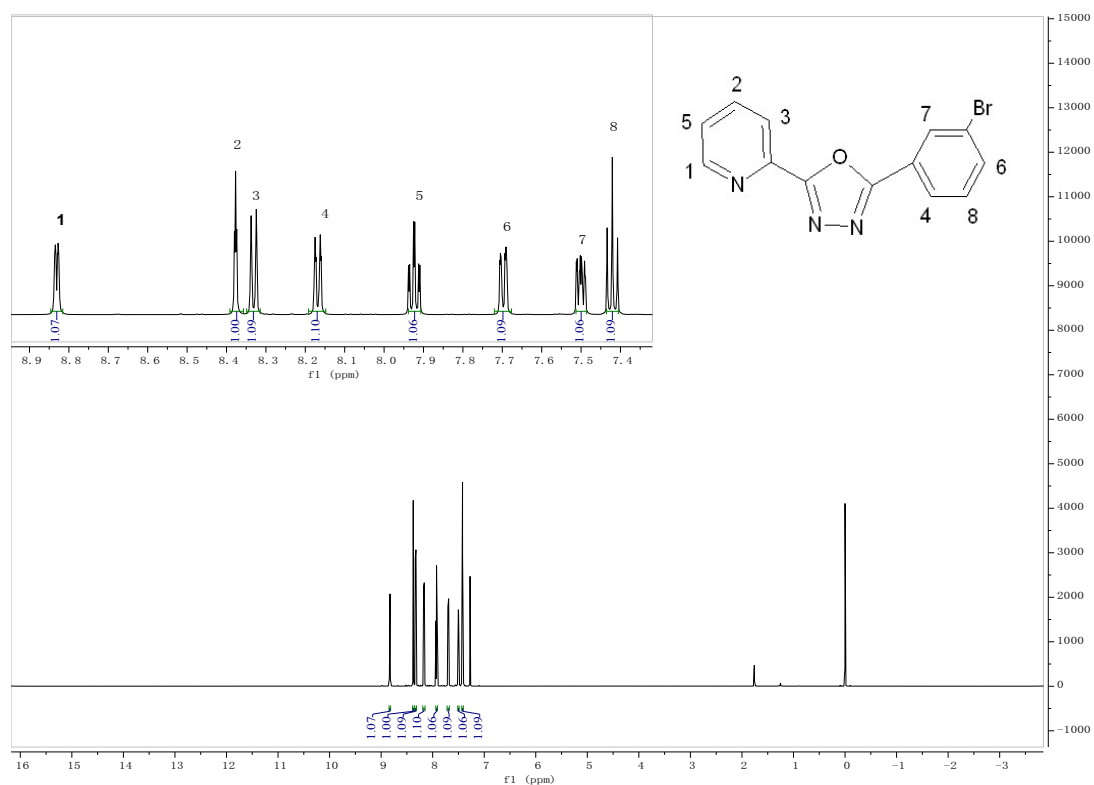

Fig. S3  $^1\text{H}$  NMR of the intermediate

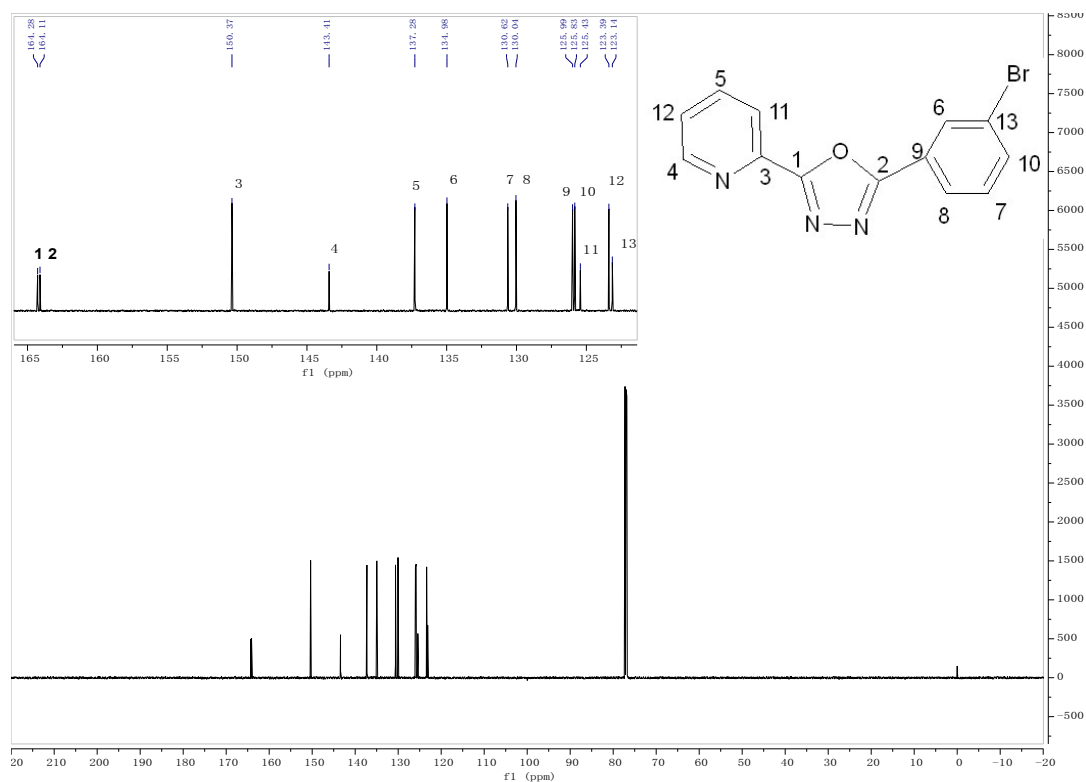

Fig. S4  $^{13}\text{C}$  NMR of the intermediate

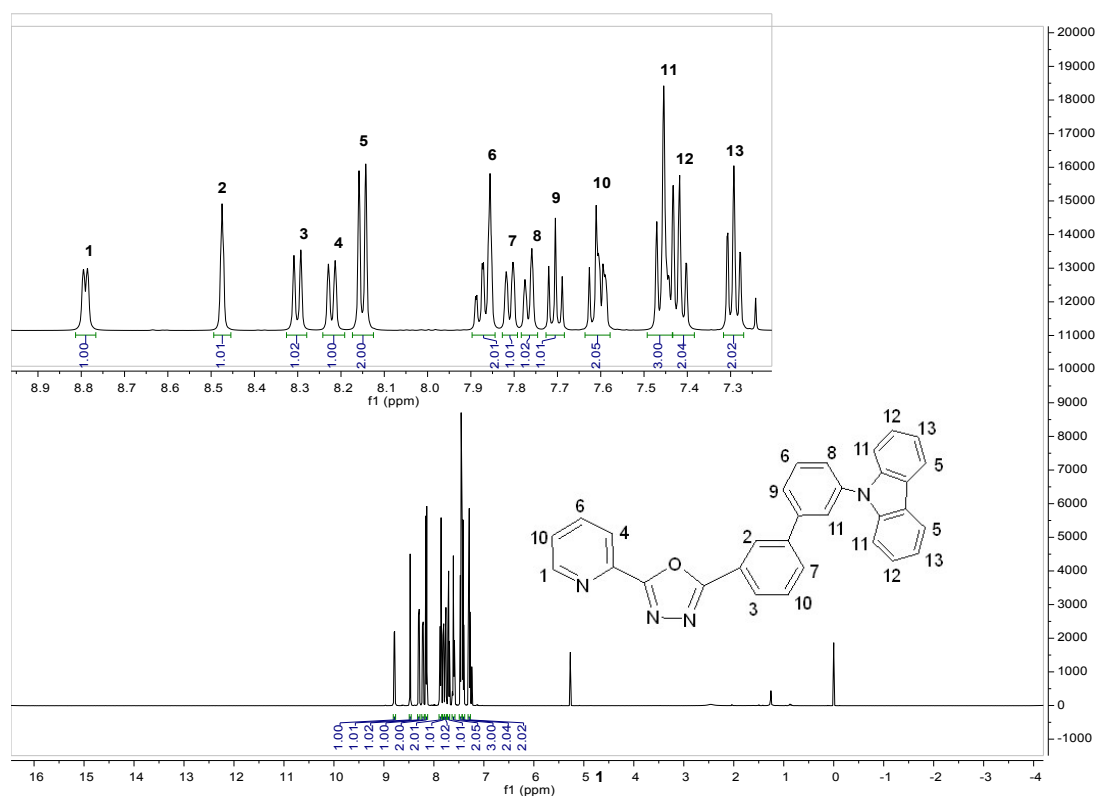

Fig. S5  $^1\text{H}$  NMR of PyOxd-mCz

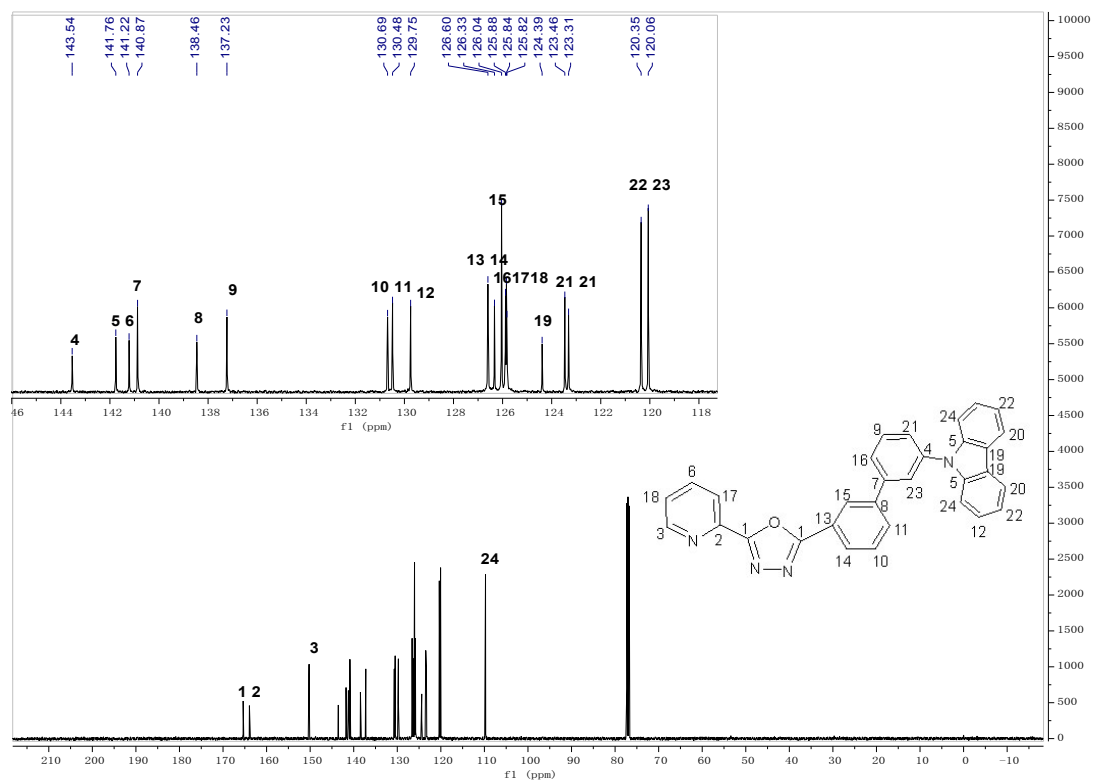

Fig. S6  $^{13}\text{C}$  NMR of PyOxd-mCz

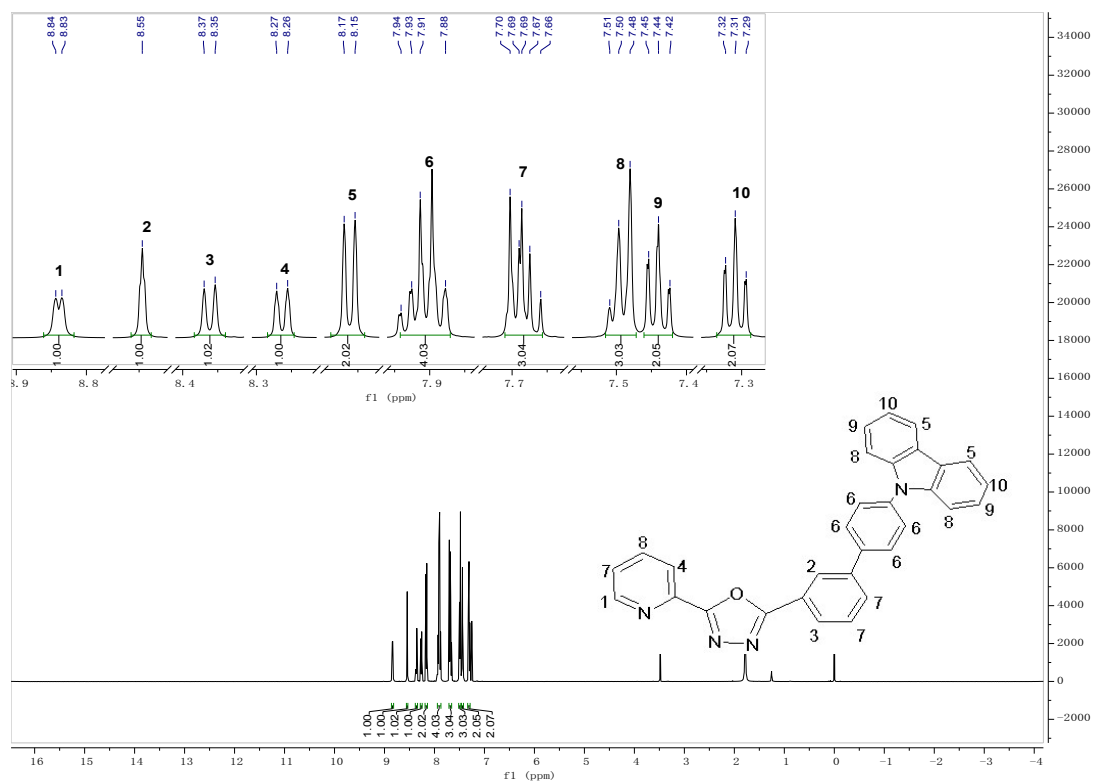

Fig. S7  $^1\text{H}$  NMR of PyOxd-pCz

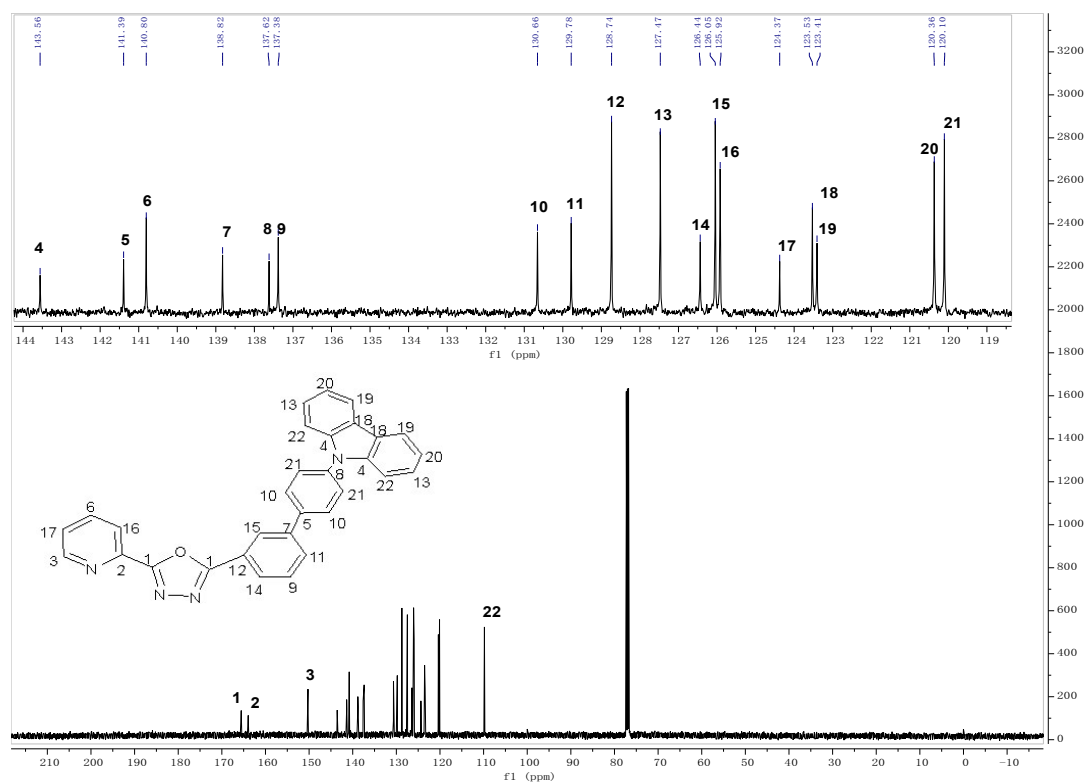

Fig. S8  $^{13}\text{C}$  NMR of PyOxd-pCz

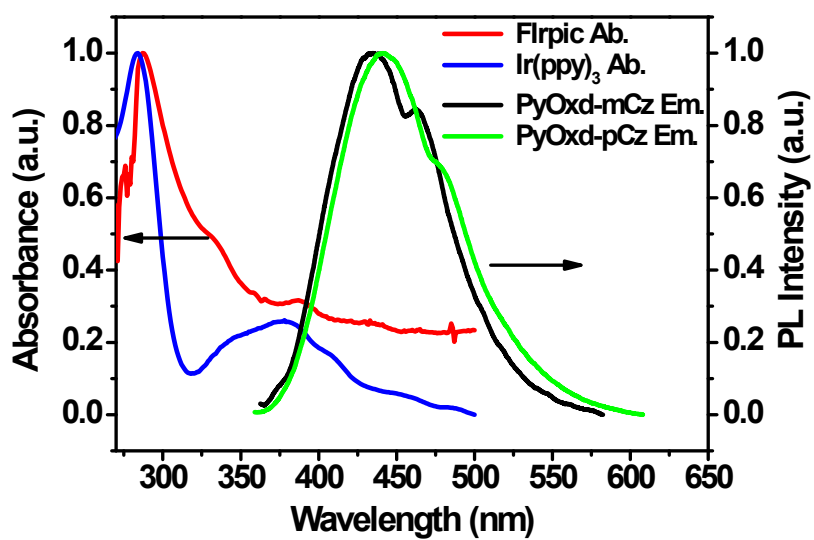

Fig. S9 UV-vis absorption of Firpic and Ir(ppy)<sub>3</sub>, room-temperature photoluminescence of PyOxd-mCz and PyOxd-pCz spectra in dilute dichloromethane solutions
